# Supplementary material for: Comparison of different mobile health applications for intervention in children and adolescent with overweight: a protocol for systematic review with meta-analysis and trial sequential analysis
Source: HighWire-hosted journal article supplement (doi:10.1136/bmjopen-2019-032570), 2020-12-01
Supplement: bmjopen-2019-032570supp001_data_supplement.pdf [file bmjopen-2019-032570supp001_data_supplement.pdf]

**Table 1 Classification of mhealth apps**

| Category         | Name of the app                | Authors         | Year | Paper Title                                                                                                                                            |
|------------------|--------------------------------|-----------------|------|--------------------------------------------------------------------------------------------------------------------------------------------------------|
| App with device  | Collective Intelligence        | Addo et al      | 2013 | Toward collective intelligence for fighting obesity                                                                                                    |
| Standalone       | iN Touch                       | Kim et al       | 2015 | Youth-centered Design and Usage Results of the iN Touch Mobile Self-management Program for Overweight/Obesity                                          |
| Real (Human)     | Personal Wellness Coach        | Asselin et al   | 2005 | Implementation and evaluation of the personal wellness coach                                                                                           |
| Virtual          | Move it move it                | Frost et al     | 2012 | We Like to Move It Move It!: Motivation and Parasocial Interaction                                                                                     |
| None             | iN Touch                       | Kim et al       | 2015 | Youth-centered Design and Usage Results of the iN Touch Mobile Self-management Program for Overweight/Obesity                                          |
| Reminder         | Txt2Bfit                       | Partridge et al | 2015 | Effectiveness of a mHealth Lifestyle Program With Telephone Support (TXT2BFIT) to Prevent Unhealthy Weight Gain in Young Adults: Randomized Controlled |
| Smart Suggestion | Teenagers and Digital Coaching | Kettunen et al  | 2018 | Can Sport and Wellness Technology be My Personal Trainer?—Teenagers and Digital Coaching                                                               |
| None             | MyFitnessPal                   | Levinson et al  | 2017 | My Fitness Pal calorie tracker usage in the eating disorders                                                                                           |
| Intangible       |                                |                 |      | **PEGASO DSAHBOARD (not published)                                                                                                                     |
| Tangible         | Pegaso City                    | Caon et al      | 2016 | PEGASO Companion: A Mobile App to Promote Healthy Lifestyles Among Adolescents                                                                         |
| None             | Fitbit for Obese               | Yoost et al     | 2018 | The Use of Fitbit Technology Among Rural Obese Adolescents                                                                                             |
| Connected        | Collective Intelligence        | Addo et al      | 2013 | Toward collective intelligence for fighting obesity                                                                                                    |
| Standalone       | Personal Wellness Coach        | Asselin et al   | 2005 | Implementation and evaluation of the personal wellness coach                                                                                           |
